# Supplementary material for: The nitrobenzoxadiazole derivative MC3181 blocks melanoma invasion and metastasis
Source: Oncotarget. 2017 Jan 17;8(9):15520–38. doi: 10.18632/oncotarget.14690 (PMC5362503; doi:10.18632/oncotarget.14690)
Supplement: Supplementary file 1 [file oncotarget-08-15520-s001.pdf]

## The nitrobenzoxadiazole derivative MC3181 blocks melanoma invasion and metastasis

### SUPPLEMENTARY DATA

### SUPPLEMENTARY METHODS

#### Reverse transcriptase-polymerase chain reaction (RT-PCR)

Primer sequences and PCR conditions were reported in international literature or designed from the predicted sequence using Gene Scan program (<http://genes.mit.edu/genscan.HTML>), and were synthesized by Tema Ricerca, Inc. Sequences were as follows: FGF2 (basic Fibroblast Growth Factor) sense AGCAGAAGAGAGAGG AGTTGTGTC and FGF2 antisense [1] CCCAGGTCCTGTTTTGGATCCAAG, VEGF (Vascular Endothelial Growth Factor) sense TCGGGCCTCCGAAAC CATGAACT and VEGF antisense TCCTGGTGAGAGATCTGGTTCCC [2]; MCAM/MUC18 sense GTCATCTTCCGT GTGCGCCA and MCAM/MUC18 antisense GTAGCGACCTC CTCAGGCTCCTTA; MCAM/MUC 18 sense nested GTCATCCGGTGCGCCA and MCAM/MUC18 antisense nested GTA GCG ACC TCC TCA GGC TCC TTA [3]; MCAM/MUC 18 long isoform sense CCCTCACACCAGACTCCAAC and MCAM/MUC 18 long isoform antisense GTTCGCTCTTAC; MCAM/MUC 18 long isoform nested sense ACG GGGGCA CGTTGGATTG and MCAM/MUC 18 long isoform nested antisense GTAGCGTGATCTCCTGCTTCC; MCAM/MUC 18 short isoform sense TCA TACCAGAGCCAACAGCA and MCAM/MUC 18 short isoform antisense CTCTCCAT TCCTGCTTCCC (common to first and nested PCR too); MCAM/MUC 18 short isoform sense nested AGAGAGAAAGCTGCCGGAG; CDH1 (epithelial cadherin) sense GACCAGGACTATG ACTACTTGAAACG and CDH1 antisense ATCTG CAAGGTGCTGGGTGAACCTT; CDH2 (neural cadherin) sense CTC CTA TGA GTG GAA CAG GAA CG and CDH2 antisense TTG GAT CAA TGT CAT AAT CAA GTG CTG TA [4]; CDH5 (vascular endothelial cadherin) sense CACTGGAACCCCCACAGGAAAAGA and

CDH5 antisense GGACAGCGTTCTCACACACTTTGG; MMP-2 (matrix metalloproteinases) sense CCTGCCCC TCCCTTCAACCA and MMP2-antisense GTTTCGGCT TCTGGCTGGGTC [2]; MMP-9 sense CCGAGTGGCAGGGGGAAGATG and MMP-9 antisense CTCACGCGCCAGTAGAAGCG. Amplification conditions were as follows: a hot start denaturation of 15 min at 94°C was always performed, followed by 40 cycles of 1 min at 94°C, 1 min of annealing at a temperature specific for each gene, and 1 min at 72°C. Annealing temperatures for each gene expression assay were as follows: VEGF at 64°C, FGF2 and CDH2 at 60°C, MMP-2 and MMP-9 at 59°C, CDH1 and CDH5 at 58°C. MCAM/MUC18 conditions for both first round and nested PCR were as follows: 94°C for 1 min, 52°C for 1 min and 72°C for 1 min for 40 /30 cycles. A hot-start Taq polymerase was employed in each amplification.

### REFERENCES

1. Hussong JW, Rodgers GM, Shami PJ. Evidence of increased angiogenesis in patients with acute myeloid leukemia. *Blood*. 2000; 95:309-313.
2. Etoh T, Inoue H, Tanaka S, Barnard GF, Kitano S, Mori M. Angiopoietin-2 is related to tumor angiogenesis in gastric carcinoma: possible *in vivo* regulation via induction of proteases. *Cancer research*. 2001; 61:2145-2153.
3. Hoon DS, Wang Y, Dale PS, Conrad AJ, Schmid P, Garrison D, Kuo C, Foshag LJ, Nizze AJ, Morton DL. Detection of occult melanoma cells in blood with a multiple-marker polymerase chain reaction assay. *Journal of clinical oncology: official journal of the American Society of Clinical Oncology*. 1995; 13:2109-2116.
4. Hagen RM, Rhodes A, Oxley J, Lodomery MR. A M-MLV reverse transcriptase with reduced RNaseH activity allows greater sensitivity of gene expression detection in formalin fixed and paraffin embedded prostate cancer samples. *Exp Mol Pathol*. 2013; 95:98-104.

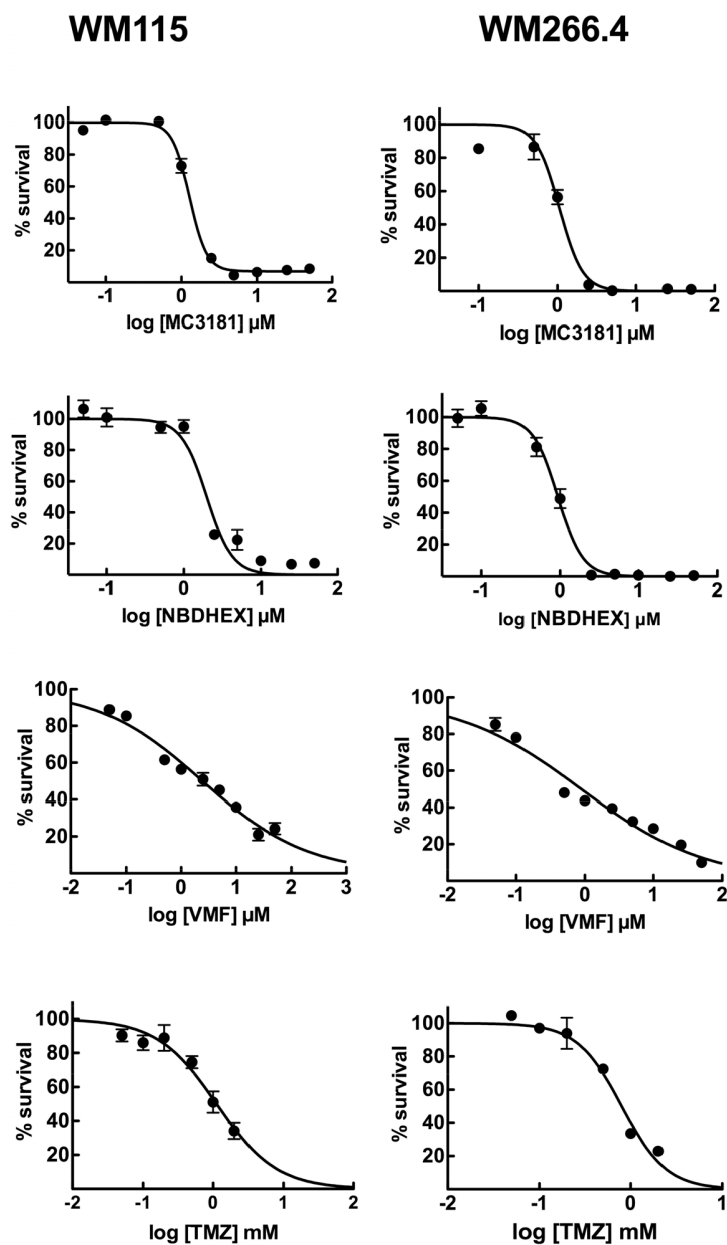

**Supplementary Figure 1: Concentration–response curves of MC3181, NBDHEX, vemurafenib (VMF) and temozolomide (TMZ).** WM115 and WM266.4 human melanoma cells were incubated with increasing concentrations of each drug, and cell growth was evaluated 48 hours later by the SRB assay.  $IC_{50}$  values were obtained from the concentration–response curves from three independent experiments, and are reported in Table 1 as means  $\pm$  SD.

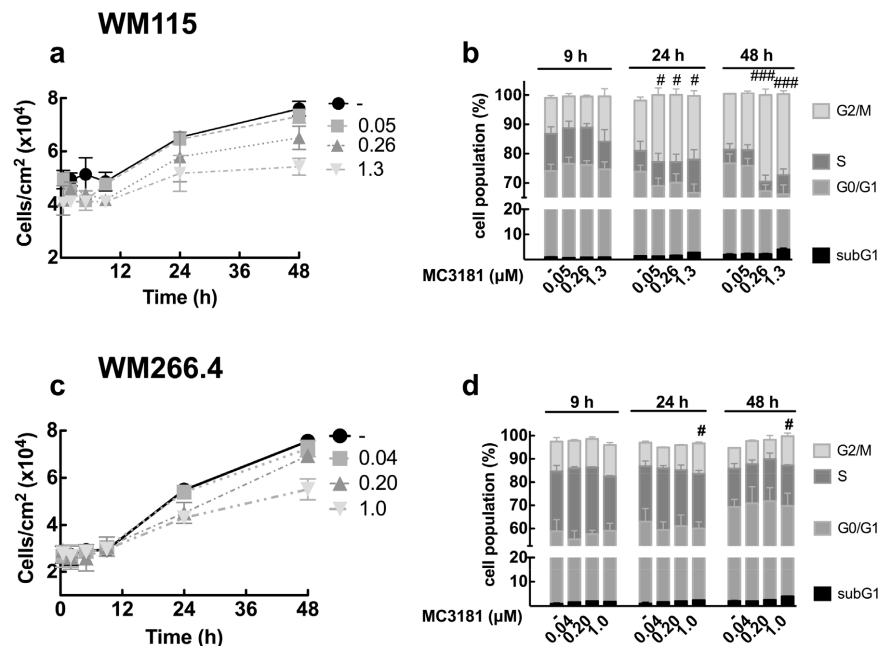

**Supplementary Figure 2: Effect of low concentrations of MC3181 on WM115 and WM266.4 cells.** Cells were treated for 48 hours with concentrations of MC3181 that matched their respective IC<sub>50</sub> values or 1/5 and 1/25 of their IC<sub>50</sub>s. **a.** WM115 and **c.** WM266.4 cell growth curves. **b.** WM115 and **d.** WM266.4 cell cycle analysis performed at various time points during exposure to different concentrations of MC3181.

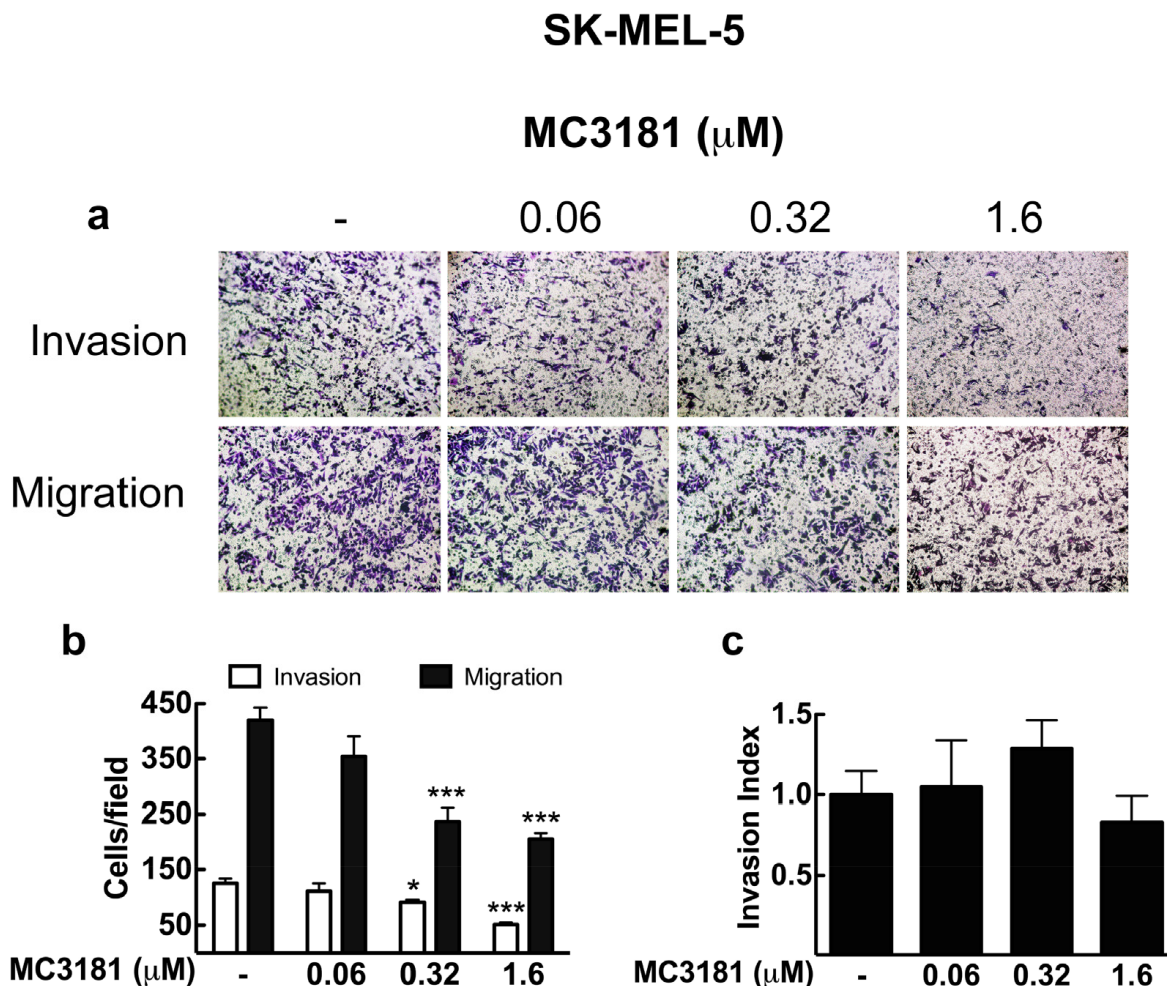

**Supplementary Figure 3: MC3181 blocks both cell invasion and migration of SK-MEL-5 melanoma cells.** The SK-MEL-5 cell line was assayed for *in vitro* invasion and migration using Boyden chambers without coating (migration) or coated with 5  $\mu\text{g}$  of Matrigel. After 48 hours of treatment with graded MC3181 concentrations, the migrated and invaded cells were stained with crystal violet and counted. **a.** Representative phase contrast images (10X magnification, 3X digital magnification) of SK-MEL-5 cells. **b.** Migrated/Invaded SK-MEL-5 cells. **c.** Invasion index was calculated as the invasion percentage of treated cells divided by the invasion percentage of non-treated cells (see equations 2 and 3 in the “Materials and Methods” section).

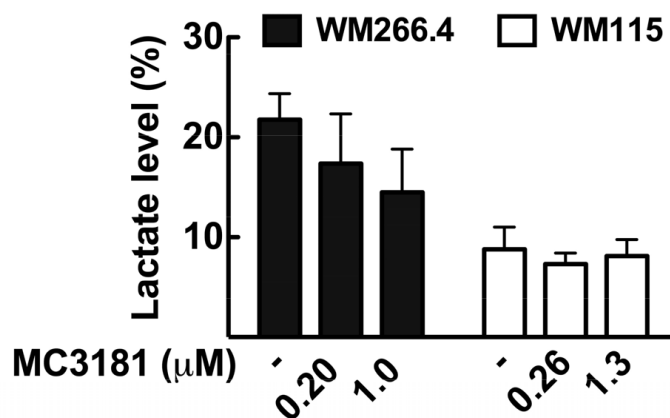

**Supplementary Figure 4: High resolution  $^1\text{H}$ -NMR analysis of WM266.4 and WM115 intracellular metabolome.** The experiment was performed on both cell lines after a 48-hours treatment with equiactive concentrations of MC3181 (0.26 and 1.3  $\mu\text{M}$  for WM115, 0.20 and 1.0  $\mu\text{M}$  for WM266.4). Lactate is reported as percentage of total metabolites involved in glucose, phospholipid and energetic metabolism.

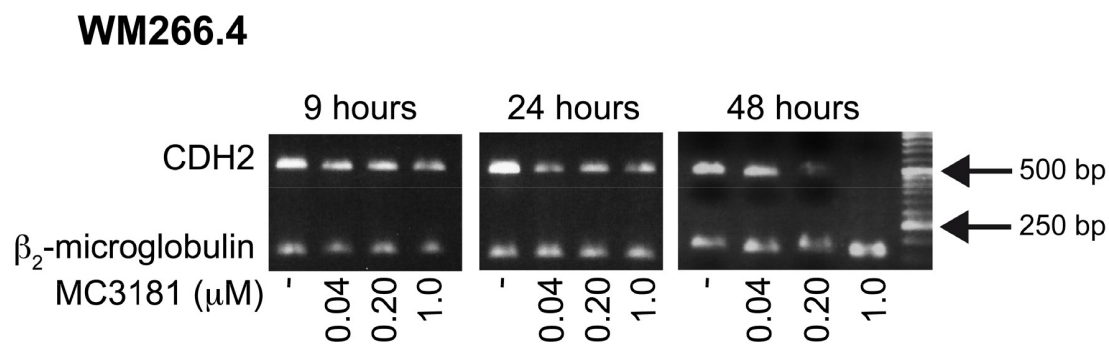

**Supplementary Figure 5: RT-PCR analysis of CDH2 mRNA in the WM266.4 cell line.** Total RNA was extracted from the cells and then reverse-transcribed by specific priming to single-stranded cDNA. The cDNA was amplified by PCR as described in the “Materials and Methods” section. PCR products were electrophoresed on a 1.8% agarose gel, stained with ethidium bromide, and the relative intensity against  $\beta_2$ -microglobulin was evaluated by the ImageJ software. Molecular weight markers were loaded in the last lane.

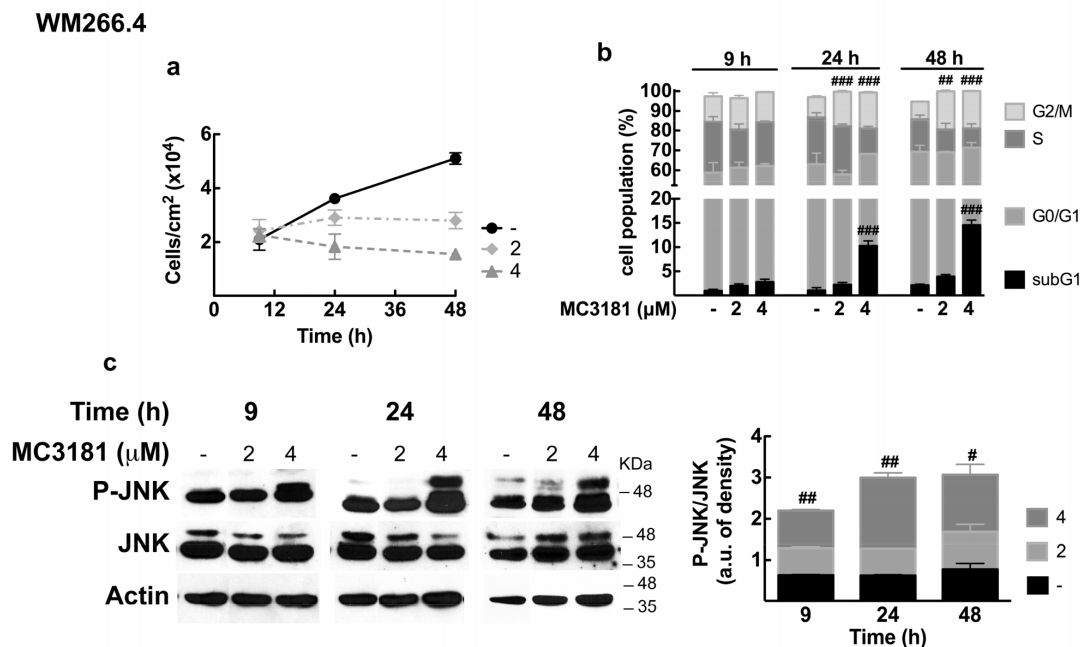

**Supplementary Figure 6: Treatment of WM266.4 cells with high concentrations of MC3181.** The compound induced cell cycle block and prolonged phospho-activation of JNK. Cells were incubated up to 48 hours with 2 and 4  $\mu$ M MC3181, i.e. concentrations corresponding to 2- and 4-fold their  $IC_{50}$  value. **a.** WM266.4 cell growth curves and **b.** cell cycle analysis performed at various time points during drug exposure. **c.** Immunoblot (left) and densitometric analysis (right) of P-JNK revealed a sustained increase of JNK activation after 9 hours of treatment; this increase lasted up to 48 hours. Phosphorylated and non-phosphorylated protein levels were quantitated by densitometry and normalized to their respective  $\beta$ -actin bands; data represent means  $\pm$  SD of three independent experiments. Significant increase: #  $P < 0.05$ , ##  $P < 0.005$ , ###  $P < 0.0005$ .

## WM266.4

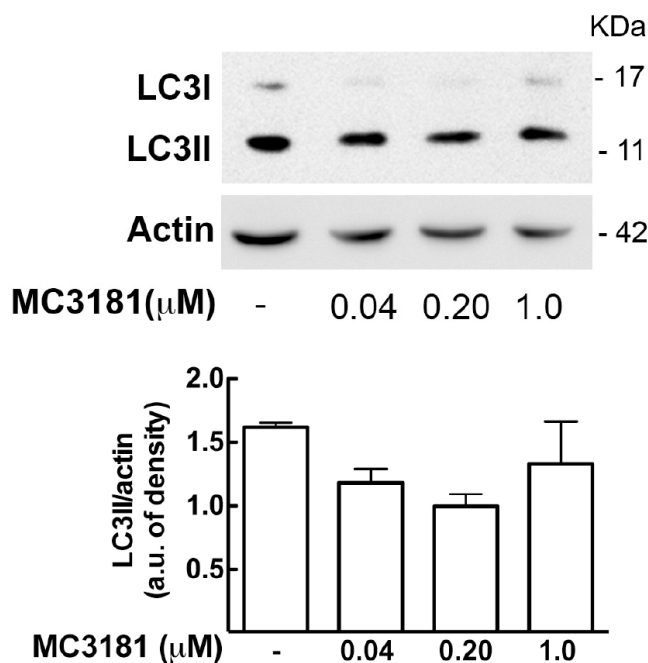

**Supplementary Figure 7: Effect of subtoxic concentrations of MC3181 on the basal autophagy of the WM266.4 cell line.** Cells were cultured for 48 hours, treated with low concentrations of MC3181 (i.e. 0.04, 0.2 and 1.0  $\mu\text{M}$ ) for additional 48 hours, and then analyzed by western blotting with anti-LC3 and anti- $\beta$ -actin antibodies. Treatment with low concentrations of MC3181 did not significantly affect the amount of the autophagosome-associated LC3-II protein.

**Supplementary Table 1A: Relative quantification of intracellular metabolites (metabolite percentage relative to total metabolites, mean  $\pm$  SEM for  $n \geq 3$ ) involved in glucose, phospholipid and energetic metabolism in WM266.4 cells following a 48-hour exposure to MC3181**

| Metabolite (%)               | MC3181 ( $\mu$ M) |                  |                  |
|------------------------------|-------------------|------------------|------------------|
|                              | -                 | 0.20             | 1.0              |
| <b>Taurine</b>               | 3.64 $\pm$ 0.25   | 3.67 $\pm$ 0.49  | 2.73 $\pm$ 0.96  |
| <b>Total creatine</b>        | 6.15 $\pm$ 0.32   | 6.95 $\pm$ 0.31  | 7.03 $\pm$ 0.11  |
| <b>Aspartate</b>             | 2.72 $\pm$ 0.45   | 2.76 $\pm$ 0.42  | 3.11 $\pm$ 0.47  |
| <b>Total glutathione</b>     | 4.05 $\pm$ 0.47   | 4.52 $\pm$ 0.49  | 5.17 $\pm$ 0.48  |
| <b>Succinate</b>             | 0.75 $\pm$ 0.12   | 0.69 $\pm$ 0.09  | 0.73 $\pm$ 0.05  |
| <b>Glutamate</b>             | 5.34 $\pm$ 0.30   | 6.04 $\pm$ 0.61  | 6.30 $\pm$ 0.52  |
| <b>Glx*</b>                  | 15.04 $\pm$ 1.26  | 16.36 $\pm$ 1.53 | 17.04 $\pm$ 1.01 |
| <b>Acetate</b>               | 4.17 $\pm$ 0.66   | 3.81 $\pm$ 0.21  | 4.23 $\pm$ 0.61  |
| <b>Alanine</b>               | 3.60 $\pm$ 0.81   | 3.24 $\pm$ 0.74  | 3.01 $\pm$ 0.58  |
| <b>Lactate</b>               | 21.76 $\pm$ 2.60  | 17.36 $\pm$ 4.98 | 14.50 $\pm$ 4.32 |
| <b>Isoleucine</b>            | 0.90 $\pm$ 0.16   | 0.94 $\pm$ 0.15  | 0.90 $\pm$ 0.14  |
| <b>Glycerophosphocholine</b> | 0.41 $\pm$ 0.05   | 1.75 $\pm$ 1.21  | 1.34 $\pm$ 0.66  |
| <b>Phosphocholine</b>        | 4.99 $\pm$ 0.87   | 6.27 $\pm$ 1.16  | 7.70 $\pm$ 1.39  |
| <b>Choline</b>               | 0.55 $\pm$ 0.20   | 0.40 $\pm$ 0.13  | 0.52 $\pm$ 0.35  |
| <b>ATP plus ADP</b>          | 1.08 $\pm$ 0.09   | 1.01 $\pm$ 0.015 | 1.07 $\pm$ 0.03  |

\*Glx: glutamine plus glutamate and glutathione

**Supplementary Table 1B: Relative quantification of intracellular metabolites (metabolite percentage relative to total metabolites, mean  $\pm$  maximum deviation; n = 2) involved in glucose, phospholipid and energetic metabolism in WM115 cells following a 48-hour exposure to MC3181**

| Metabolite (%)               | MC3181 ( $\mu$ M) |                  |                  |
|------------------------------|-------------------|------------------|------------------|
|                              | -                 | 0.26             | 1.3              |
| <b>Taurine</b>               | 2.25 $\pm$ 0.53   | 1.86 $\pm$ 0.13  | 1.72 $\pm$ 0.01  |
| <b>Total creatine</b>        | 3.53 $\pm$ 0.41   | 3.39 $\pm$ 0.27  | 3.47 $\pm$ 0.09  |
| <b>Aspartate</b>             | 3.70 $\pm$ 0.57   | 4.11 $\pm$ 0.28  | 3.87 $\pm$ 0.32  |
| <b>Total glutathione</b>     | 5.99 $\pm$ 0.01   | 6.42 $\pm$ 0.31  | 7.16 $\pm$ 0.01  |
| <b>Succinate</b>             | 0.70 $\pm$ 0.02   | 0.77 $\pm$ 0.07  | 0.76 $\pm$ 0.06  |
| <b>Glutamate</b>             | 8.74 $\pm$ 0.31   | 8.31 $\pm$ 0.36  | 8.32 $\pm$ 0.25  |
| <b>Glx*</b>                  | 21.16 $\pm$ 0.92  | 21.39 $\pm$ 0.06 | 21.26 $\pm$ 0.42 |
| <b>Acetate</b>               | 4.08 $\pm$ 2.04   | 2.85 $\pm$ 1.83  | 2.15 $\pm$ 1.57  |
| <b>Alanine</b>               | 2.64 $\pm$ 0.36   | 2.91 $\pm$ 0.51  | 2.75 $\pm$ 0.37  |
| <b>Lactate</b>               | 8.79 $\pm$ 2.22   | 7.31 $\pm$ 1.10  | 8.12 $\pm$ 1.66  |
| <b>Isoleucine</b>            | 0.82 $\pm$ 0.07   | 0.88 $\pm$ 0.14  | 0.82 $\pm$ 0.09  |
| <b>Glycerophosphocholine</b> | 3.08 $\pm$ 1.54   | 1.94 $\pm$ 0.97  | 2.35 $\pm$ 0.21  |
| <b>Phosphocholine</b>        | 8.39 $\pm$ 0.84   | 8.35 $\pm$ 0.53  | 9.42 $\pm$ 1.23  |
| <b>Choline</b>               | 0.44 $\pm$ 0.25   | 0.99 $\pm$ 0.21  | 0.32 $\pm$ 0.22  |
| <b>ATP plus ADP</b>          | 0.89 $\pm$ 0.06   | 1.23 $\pm$ 0.18  | 1.21 $\pm$ 0.18  |

\*Glx: glutamine plus glutamate and glutathione
